# Supplementary material for: Vestibular prognosis in idiopathic sudden sensorineural hearing loss with vestibular dysfunction treated with oral or intratympanic glucocorticoids: a protocol for randomized controlled trial
Source: Springer Nature journal article supplement (doi:10.1186/s13063-020-04579-6), 2020-07-22
Supplement: MOESM3 [file 18206198]

## 不良事件监测 ADVERSE EVENTS

中心编号:

患者编号:

填写日期:

|                                                           |                                                                                                                                                                                                                                                                                                                                                      |  |
|-----------------------------------------------------------|------------------------------------------------------------------------------------------------------------------------------------------------------------------------------------------------------------------------------------------------------------------------------------------------------------------------------------------------------|--|
| 不良事件名称 Adverse event name                                 |                                                                                                                                                                                                                                                                                                                                                      |  |
| 严重程度 Intensity                                            | <input type="checkbox"/> 轻度 Mild <input type="checkbox"/> 中度 Moderate <input type="checkbox"/> 重度 Severe                                                                                                                                                                                                                                             |  |
| 如发生严重不良事件请说明 If SAE specify:                              | <input type="checkbox"/> 死亡 Death<br><input type="checkbox"/> 威胁生命的 Life-threatening<br><input type="checkbox"/> 持续或有症状的残疾或无行为能力 Persistent or symptomatic disability or incapacity<br><input type="checkbox"/> 因不良事件住院或延长治疗时间 Hospitalisation or prolongation of treatment<br><input type="checkbox"/> 其他重要医疗事件 Other important medical event _____ |  |
| 发生时间 Onset Date                                           | (YYYY-MM-DD)                                                                                                                                                                                                                                                                                                                                         |  |
| 结束时间 End Date                                             | 或 OR <input type="checkbox"/> 持续到研究结束 Ongoing at the end of study                                                                                                                                                                                                                                                                                    |  |
| 治疗方式 Therapy                                              | <input type="checkbox"/> 无 None <input type="checkbox"/> 药物, 请说明药物名称 Drug _____<br><input type="checkbox"/> 其他, 请说明 Other _____ <input type="checkbox"/> 药物及其他, 请说明 Drug and other _____                                                                                                                                                             |  |
| 研究干预调整<br>Action Taken with Interventions                 | <input type="checkbox"/> 干预方式无改变 Intervention unchanged <input type="checkbox"/> 干预频次减少 Frequency reduced<br><input type="checkbox"/> 暂时中止治疗 Intervention temporarily interrupted <input type="checkbox"/> 停止干预 Intervention withdrawn<br><input type="checkbox"/> 干预频次增加 Frequency increased <input type="checkbox"/> 未知 Not Known                  |  |
| 研究用药调整<br>Action Taken with Study Drug                    | <input type="checkbox"/> 剂量无改变 Dose unchanged <input type="checkbox"/> 剂量减少 Dose reduced<br><input type="checkbox"/> 暂时中止用药 Drug temporarily interrupted <input type="checkbox"/> 停止用药 Drug withdrawn<br><input type="checkbox"/> 剂量增加 Dose increased <input type="checkbox"/> 未知 Not Known                                                          |  |
| 结局 Outcome                                                | <input type="checkbox"/> 完全恢复 Recovered <input type="checkbox"/> 正在恢复中 Recovering<br><input type="checkbox"/> 恢复, 但留有后遗症 Recovering with sequelae <input type="checkbox"/> 症状仍然存在 Continuing<br><input type="checkbox"/> 致死 Fatal <input type="checkbox"/> 未知 Not Known                                                                              |  |
| 不良事件与研究干预相关性<br>Relationship to Study drug/ interventions | <input type="checkbox"/> 确定 Certain <input type="checkbox"/> 很可能 Probable <input type="checkbox"/> 可能 Possible<br><input type="checkbox"/> 不太可能 Unlikely <input type="checkbox"/> 不相关 Not related <input type="checkbox"/> 无法确认 Unclassified                                                                                                         |  |
